# Supplementary material
Source: PubMed Central journal article supplement (PMC8084715)
Supplement: mmc1.pdf [file mmc1.pdf]

## **ISN-GKHA: Structures, organization, and services for the management of kidney failure in Oceania and South East Asia**

### **Supplementary Tables, Figures, and Appendix**

**Table S1.** General demographic, economic indicators, and burden of chronic kidney disease in the Oceania and South East Asia countries and territories not participating in the ISN-GKHA survey.

**Table S2.** Burden of chronic kidney disease and its risk factors in the 15 Oceania and South East Asia countries and territory participating in the ISN-GKHA survey.

**Figure S1.** Shortage in kidney care providers identified by the 15 Oceania and South East Asia countries and territory participating in the ISN-GKHA survey.

**Figure S2.** Proportion of patients starting dialysis with different forms of vascular access and adequate education in countries and territory participating in the ISN-GKHA survey.

**Figure S3.** Availability of services to diagnose and treat complications of kidney failure reported by the 15 Oceania and South East Asia countries and territory participating in the ISN-GKHA survey.

**Figure S4.** Quality indicators monitored and reported by the 15 Oceania and South East Asia countries and territory participating in the ISN-GKHA survey.

**Figure S5.** Registry characteristics for the Oceania and South East Asia countries and territory that have reported having one or more in the ISN-GKHA survey.

**Figure S6.** National strategies available in countries reported by the 15 Oceania and South East Asia countries and territory participating in the ISN-GKHA survey.

**Figure S7.** Population covered under national non-communicable disease and chronic kidney disease strategies reported by the 15 Oceania and South East Asia countries and territory participating in the ISN-GKHA survey.

**Appendix.** Reference list for annual cost of kidney replacement therapy (for Table 1).

**Table S1.** General demographic, economic indicators, and burden of chronic kidney disease in the Oceania and South East Asia countries and territories not participating in the ISN-GKHA survey.<sup>S1,S2,S3</sup>

| Country/Territory              | World Bank ranking  | Area (km <sup>2</sup> ) | Total population (2018) | GDP (PPP) (billion, est. 2017, US\$) | Total health expenditures (% of GDP) | CKD Prevalence % (95% CI) |
|--------------------------------|---------------------|-------------------------|-------------------------|--------------------------------------|--------------------------------------|---------------------------|
| American Samoa (USA)           | Upper-middle income | 224                     | 50,826                  | 0.658                                | ---                                  | 11.89 (10.97-12.84)       |
| French Polynesia (France)      | High-income         | 4167                    | 290,373                 | 5.49                                 | ---                                  | ---                       |
| Guam (USA)                     | High-income         | 544                     | 167,772                 | 5.793                                | ---                                  | 13.41 (12.41-14.49)       |
| Kiribati                       | Lower-middle income | 811                     | 109,367                 | 0.227                                | 11.9                                 | 9.93 (9.15-10.78)         |
| Marshall Islands*              | Upper-middle income | 181                     | 75,684                  | 0.196                                | 23.3                                 | 9.67 (8.88-10.47)         |
| Micronesia, Federal States of* | Lower-middle income | 702                     | 103,643                 | 0.348                                | 12.6                                 | 10.70 (9.88-11.62)        |
| Nauru                          | Upper-middle income | 21                      | 9,692                   | 0.160                                | 11.1                                 | ---                       |
| Northern Mariana Islands (USA) | High-income         | 464                     | 51,994                  | 1.242                                | ---                                  | 14.69 (13.47-16.05)       |
| Palau                          | High-income         | 459                     | 21,516                  | 0.264                                | 11.7                                 | ---                       |
| Papua New Guinea               | Lower-middle income | 462,840                 | 7,027,332               | 30.19                                | 2.0                                  | 8.23 (7.54-8.94)          |
| Solomon Islands                | Lower-middle income | 28,896                  | 660,121                 | 1.33                                 | 5.2                                  | 8.63 (7.96-9.41)          |
| Timor-Leste                    | Lower-middle income | 14,874                  | 1,321,929               | 7.426                                | 4.0                                  | 7.47 (6.94-8.07)          |
| Tonga                          | Upper-middle income | 747                     | 106,398                 | 0.591                                | 5.3                                  | 11.81 (10.91-12.75)       |
| Tuvalu                         | Upper-middle income | 26                      | 11,147                  | 0.042                                | 15.5                                 | ---                       |
| Vanuatu                        | Lower-middle income | 12,189                  | 288,037                 | 0.772                                | 3.7                                  | 9.03 (8.36-9.80)          |

Abbreviations: CI: confidence interval; GDP: gross domestic product; PPP: purchasing power parity; ISN: International Society of Nephrology; GKHA: Global Kidney Health Atlas; CKD: chronic kidney disease

Results of CKD prevalence are expressed as percentage (%) of the population.

'---': data not available

\*associated with the USA

**Table S2.** Burden of chronic kidney disease and its risk factors in the 15 Oceania and South East Asia countries and territory participating in the ISN-GKHA survey.<sup>S1,S2</sup>

| Country/Territory | CKD Prevalence % (95% CI) | Death attributed to CKD % (95% CI) | DALYs attributed to CKD % (95% CI) | Obesity % (95% CI) | Increased BP % (95% CI) | Smoking % (95% CI) |
|-------------------|---------------------------|------------------------------------|------------------------------------|--------------------|-------------------------|--------------------|
| Australia         | 11.15 (10.35 - 12.08)     | 2.61 (2.48 - 2.74)                 | 1.26 (1.14 - 1.38)                 | 30.4 (26.5 - 34.4) | 15.2 (11.5 - 19.4)      | 14.6 (13.6 - 15.6) |
| Brunei Darussalam | 10.26 (9.36 - 11.23)      | 3.75 (3.48 - 4.03)                 | 2.45 (2.18 - 2.71)                 | 14.7 (11.0 - 18.9) | 18.9 (13.5 - 25.2)      | 12.7 (11.3 - 14.2) |
| Cambodia          | 8.0 (7.39 - 8.66)         | 1.8 (1.66 - 1.96)                  | 1.26 (1.13 - 1.4)                  | 3.5 (2.3 - 5.1)    | 26.1 (19.6 - 33.0)      | 15.4 (13.7 - 17.1) |
| Fiji              | 13.64 (12.56 - 14.8)      | 3.83 (3.53 - 4.14)                 | 2.7 (2.44 - 2.96)                  | 30.0 (24.4 - 35.9) | 21.7 (15.6 - 28.7)      | 11.1 (9.5 - 12.9)  |
| Indonesia         | 10.84 (9.99 - 11.71)      | 2.16 (2.07 - 2.33)                 | 1.71 (1.57 - 1.83)                 | 6.9 (5.1 - 9.1)    | 23.8 (18.5 - 29.5)      | 25.6 (23.6 - 27.8) |
| Lao PDR           | 8.54 (7.9 - 9.22)         | 2.3 (1.99 - 2.54)                  | 1.51 (1.29 - 1.72)                 | 4.5 (3.0 - 6.4)    | 24.8 (18.8 - 31.1)      | 25.1 (21.6 - 29.2) |
| Malaysia          | 11.08 (10.12 - 12.1)      | 2.86 (2.65 - 3.1)                  | 1.85 (1.67 - 2.06)                 | 15.3 (12.3 - 18.7) | 22.9 (17.9 - 28.7)      | 17.2 (15.2 - 19.2) |
| Myanmar           | 10.23 (9.45 - 11.03)      | 2.93 (2.69 - 3.3)                  | 2.07 (1.84 - 2.32)                 | 5.7 (4.0 - 7.8)    | 24.6 (18.5 - 31.1)      | 15.0 (13.3 - 17.0) |
| New Caledonia     | -                         | -                                  | -                                  | -                  | -                       | -                  |
| New Zealand       | 10.95 (10.15 - 11.87)     | 2.37 (2.26 - 2.48)                 | 1.27 (1.14 - 1.4)                  | 32.0 (28.4 - 35.6) | 16.2 (12.3 - 20.8)      | 15.3 (14.4 - 16.2) |
| Philippines       | 9.31 (8.6 - 10.02)        | 5.11 (4.84 - 5.37)                 | 3.31 (2.97 - 3.65)                 | 6.0 (4.3 - 8.1)    | 22.6 (17.4 - 28.1)      | 20.1 (17.5 - 23.0) |
| Samoa             | 9.94 (9.19 - 10.69)       | 5.21 (4.56 - 5.75)                 | 3.07 (2.63 - 3.51)                 | 45.5 (39.8 - 51.5) | 24.0 (17.9 - 30.8)      | 21.5 (18.5 - 24.7) |
| Singapore         | 12.43 (11.49 - 13.46)     | 3 (2.85 - 3.15)                    | 1.81 (1.6 - 2.01)                  | 6.6 (4.6 - 9.0)    | 14.6 (10.8 - 19.0)      | 12.4 (11.1 - 13.7) |
| Thailand          | 13.9 (12.75 - 15.13)      | 4.69 (4.15 - 5.02)                 | 2.74 (2.45 - 3.02)                 | 10.8 (8.0 - 14.0)  | 22.3 (16.9 - 28.3)      | 17.9 (15.8 - 20.3) |
| Vietnam           | 10.72 (9.93 - 11.59)      | 2.87 (2.63 - 3.12)                 | 1.89 (1.7 - 2.09)                  | 2.1 (1.4 - 3.1)    | 23.4 (18.0 - 29.4)      | 18.8 (16.8 - 20.9) |

Abbreviations: CI: confidence interval; CKD: chronic kidney disease; DALYs: disability-adjusted life years; BP: blood pressure; ISN: International Society of Nephrology; GKHA: Global Kidney Health Atlas

Results are expressed as percentage (%) of the population.

'-': data not available

**Figure S1.** Shortage in kidney care providers identified by the 15 Oceania and South East Asia countries and territory participating in the ISN-GKHA survey.

|                   | Nephrologists | Transplant surgeons | Surgeons (HD access) | Surgeons (PD access) | Interventional radiologists (HD access) | Interventional radiologists (PD access) | Dietitians | Laboratory technicians | Radiologists (ultrasound) | Vascular access coordinators | Counsellors/psychologists | Transplant coordinators | Dialysis nurses | Dialysis technicians | TOTAL SHORTAGE |
|-------------------|---------------|---------------------|----------------------|----------------------|-----------------------------------------|-----------------------------------------|------------|------------------------|---------------------------|------------------------------|---------------------------|-------------------------|-----------------|----------------------|----------------|
| N=                | 12            | 10                  | 11                   | 10                   | 11                                      | 9                                       | 8          | 6                      | 5                         | 12                           | 11                        | 10                      | 12              | 11                   |                |
| Australia         |               |                     |                      |                      |                                         |                                         |            |                        |                           |                              |                           |                         |                 |                      | 0              |
| Brunei Darussalam |               |                     |                      |                      |                                         |                                         |            |                        |                           |                              |                           |                         |                 |                      | 11             |
| Cambodia          |               |                     |                      |                      |                                         |                                         |            |                        |                           |                              |                           |                         |                 |                      | 14             |
| Fiji              |               |                     |                      |                      |                                         |                                         |            |                        |                           |                              |                           |                         |                 |                      | 11             |
| Indonesia         |               |                     |                      |                      |                                         |                                         |            |                        |                           |                              |                           |                         |                 |                      | 12             |
| Lao PDR           |               |                     |                      |                      |                                         |                                         |            |                        |                           |                              |                           |                         |                 |                      | 7              |
| Malaysia          |               |                     |                      |                      |                                         |                                         |            |                        |                           |                              |                           |                         |                 |                      | 14             |
| Myanmar           |               |                     |                      |                      |                                         |                                         |            |                        |                           |                              |                           |                         |                 |                      | 14             |
| New Caledonia     |               |                     |                      |                      |                                         |                                         |            |                        |                           |                              |                           |                         |                 |                      | 1              |
| New Zealand       |               |                     |                      |                      |                                         |                                         |            |                        |                           |                              |                           |                         |                 |                      | 5              |
| Philippines       |               |                     |                      |                      |                                         |                                         |            |                        |                           |                              |                           |                         |                 |                      | 12             |
| Samoa             |               |                     |                      |                      |                                         |                                         |            |                        |                           |                              |                           |                         |                 |                      | 11             |
| Singapore         |               |                     |                      |                      |                                         |                                         |            |                        |                           |                              |                           |                         |                 |                      | 5              |
| Thailand          |               |                     |                      |                      |                                         |                                         |            |                        |                           |                              |                           |                         |                 |                      | 9              |
| Vietnam           |               |                     |                      |                      |                                         |                                         |            |                        |                           |                              |                           |                         |                 |                      | 12             |

Abbreviations: ISN: International Society of Nephrology; GKHA: Global Kidney Health Atlas; HD: hemodialysis; PD: peritoneal dialysis; PDR: People's Democratic Republic

No shortage

Shortage

**Figure S2.** Proportion of patients starting dialysis with different forms of vascular access and adequate education in countries and territory participating in the ISN-GKHA survey.

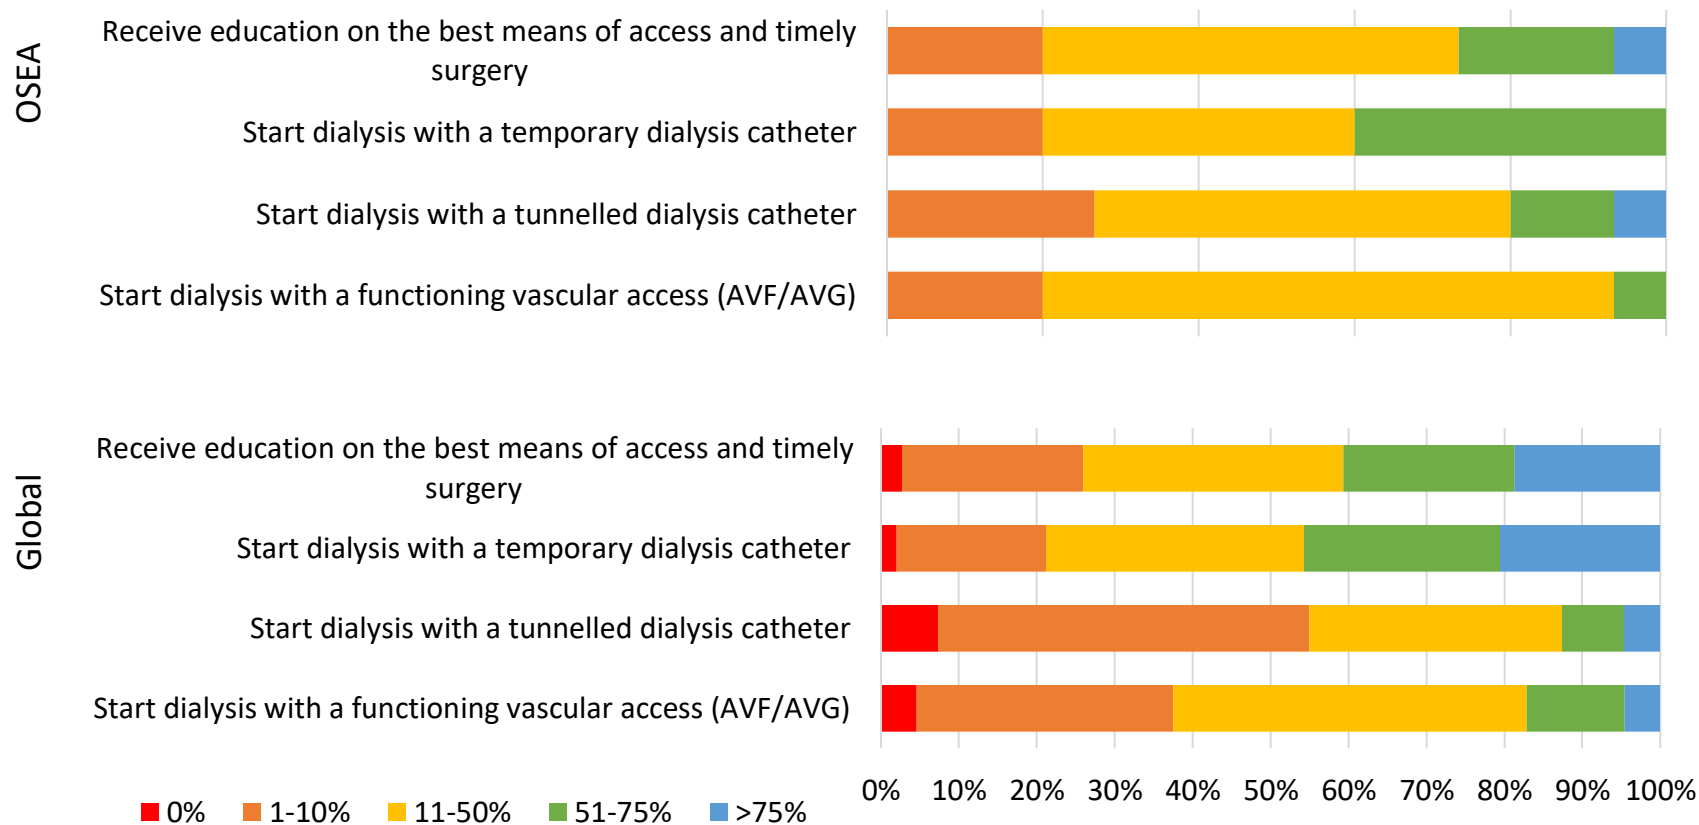

Abbreviations: ISN: International Society of Nephrology; GKHA: Global Kidney Health Atlas; AVF: arteriovenous fistula; AVG: arteriovenous graft; OSEA: Oceania and South East Asia

**Figure S3.** Availability of services to diagnose and treat complications of kidney failure reported by the 15 Oceania and South East Asia countries and territory participating in the ISN-GKHA survey.

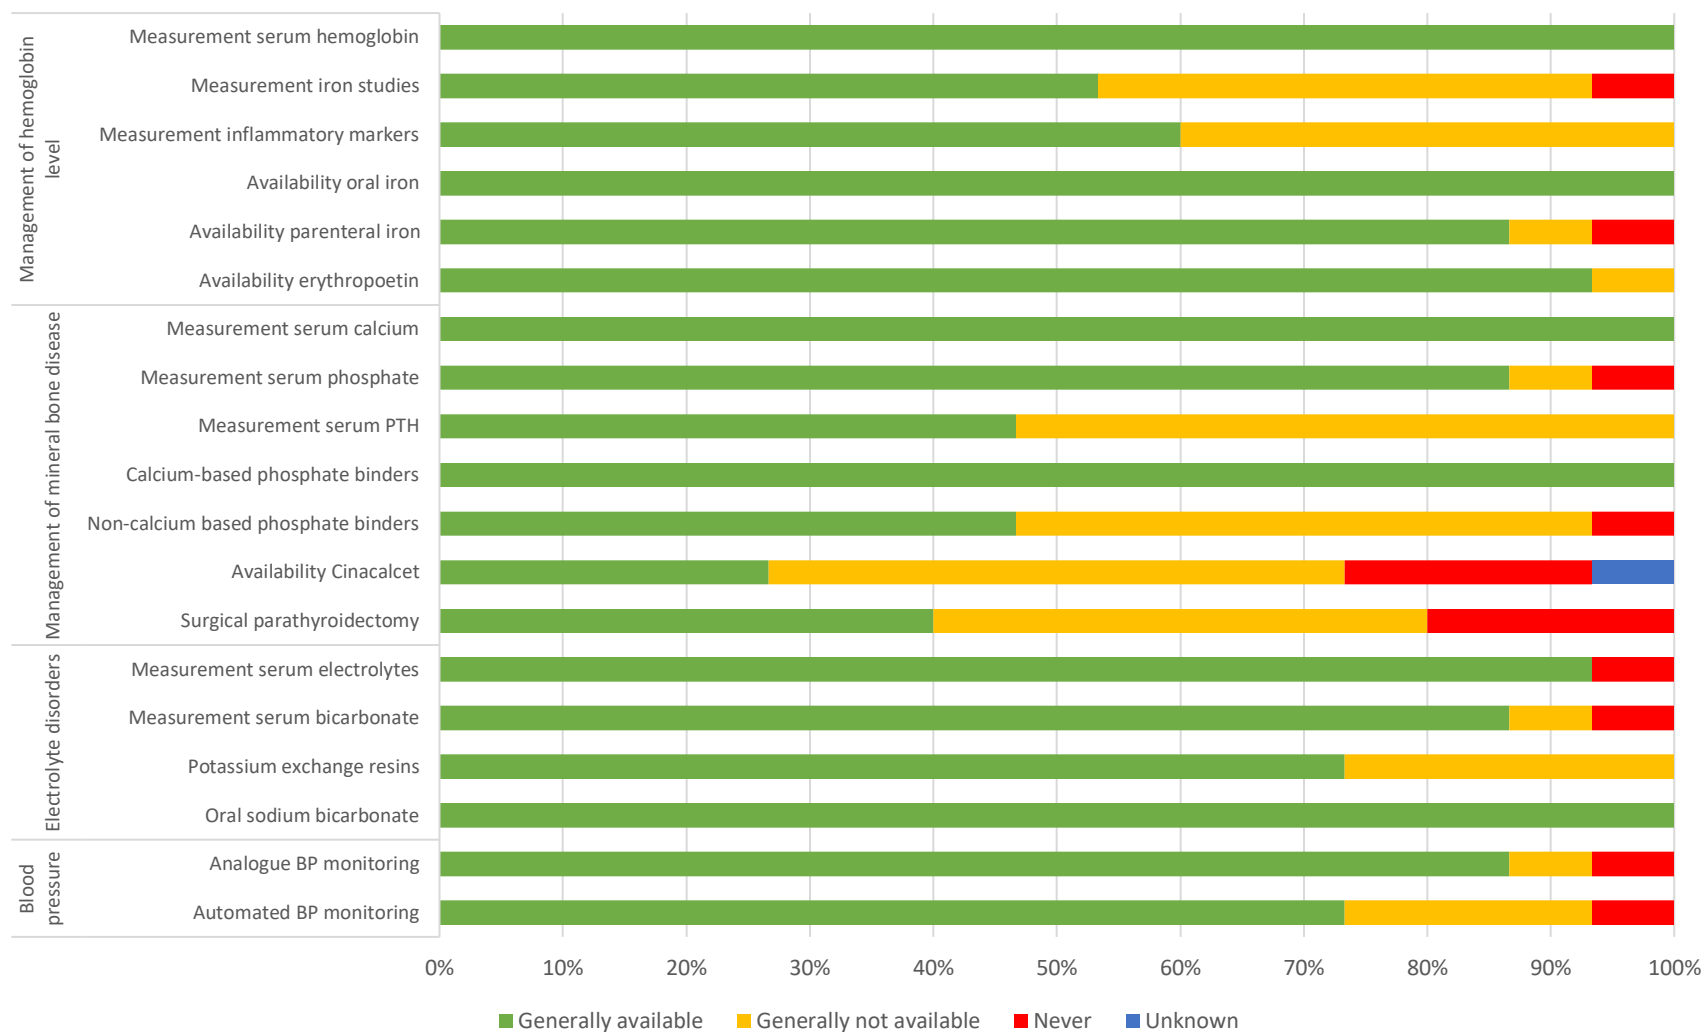

Abbreviations: ISN: International Society of Nephrology; GKHA: Global Kidney Health Atlas; BP: blood pressure; PTH: parathyroid hormone

**Figure S4.** Quality indicators monitored and reported by the 15 Oceania and South East Asia countries and territory participating in the ISN-GKHA survey.

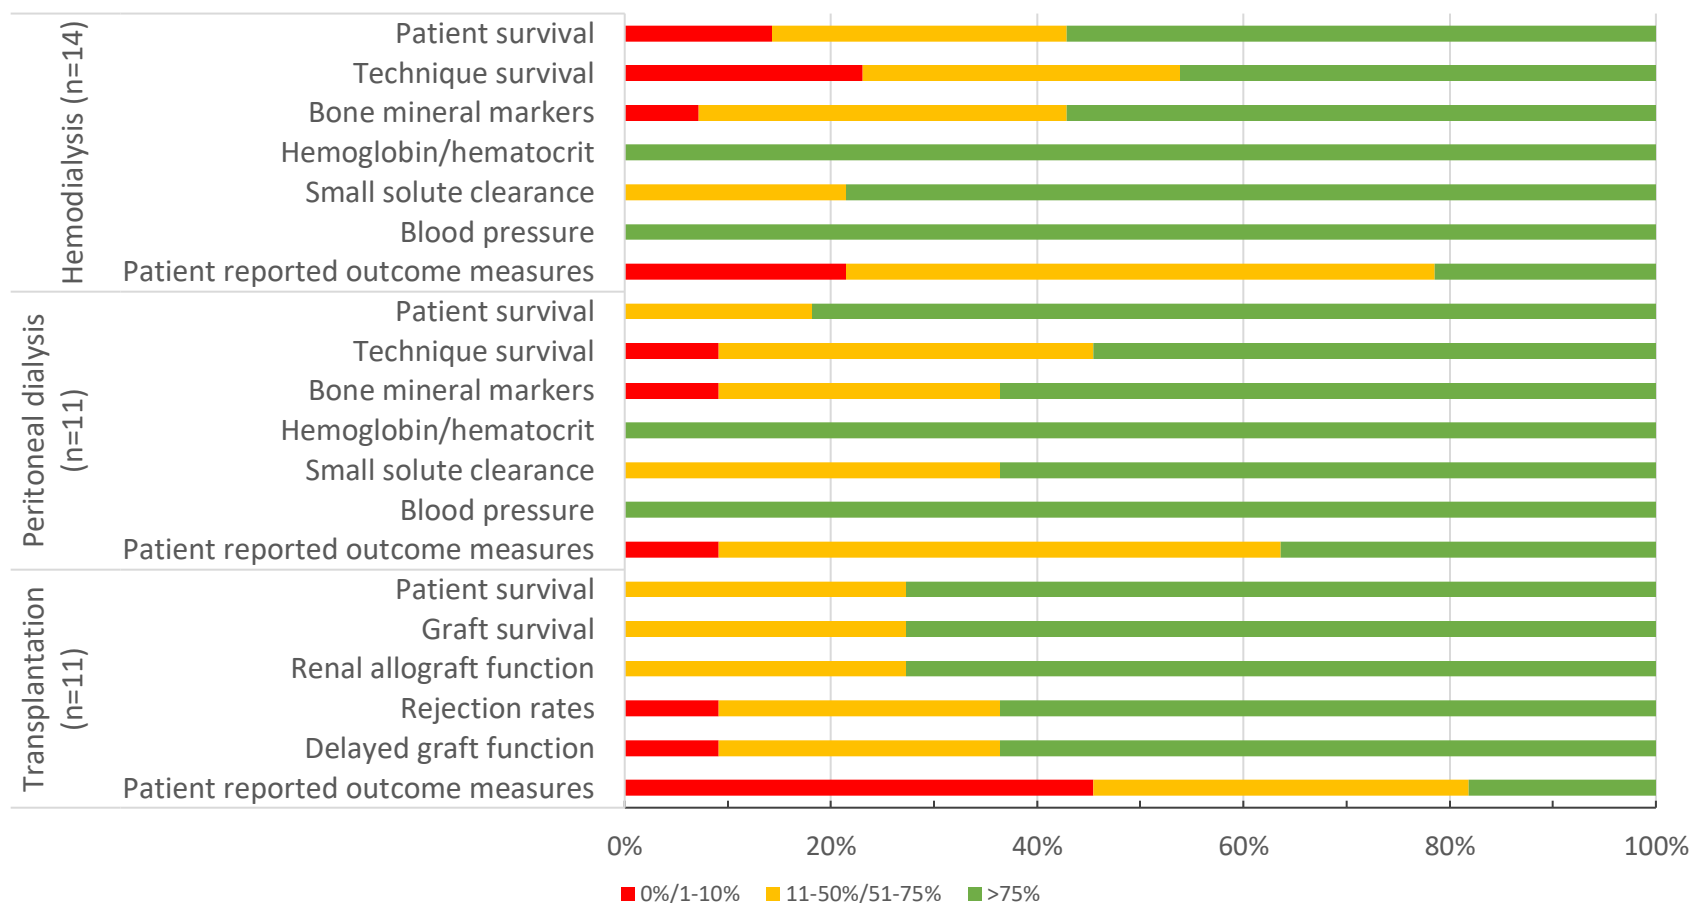

Abbreviations: ISN: International Society of Nephrology; GKHA: Global Kidney Health Atlas

Hemodialysis: data is missing for Lao People’s Democratic Republic; Peritoneal dialysis: data is missing for Fiji; Transplantation: data is included for New Caledonia



**Figure S5.** Registry characteristics for the Oceania and South East Asia countries and territory that have reported having one or more in the ISN-GKHA survey.

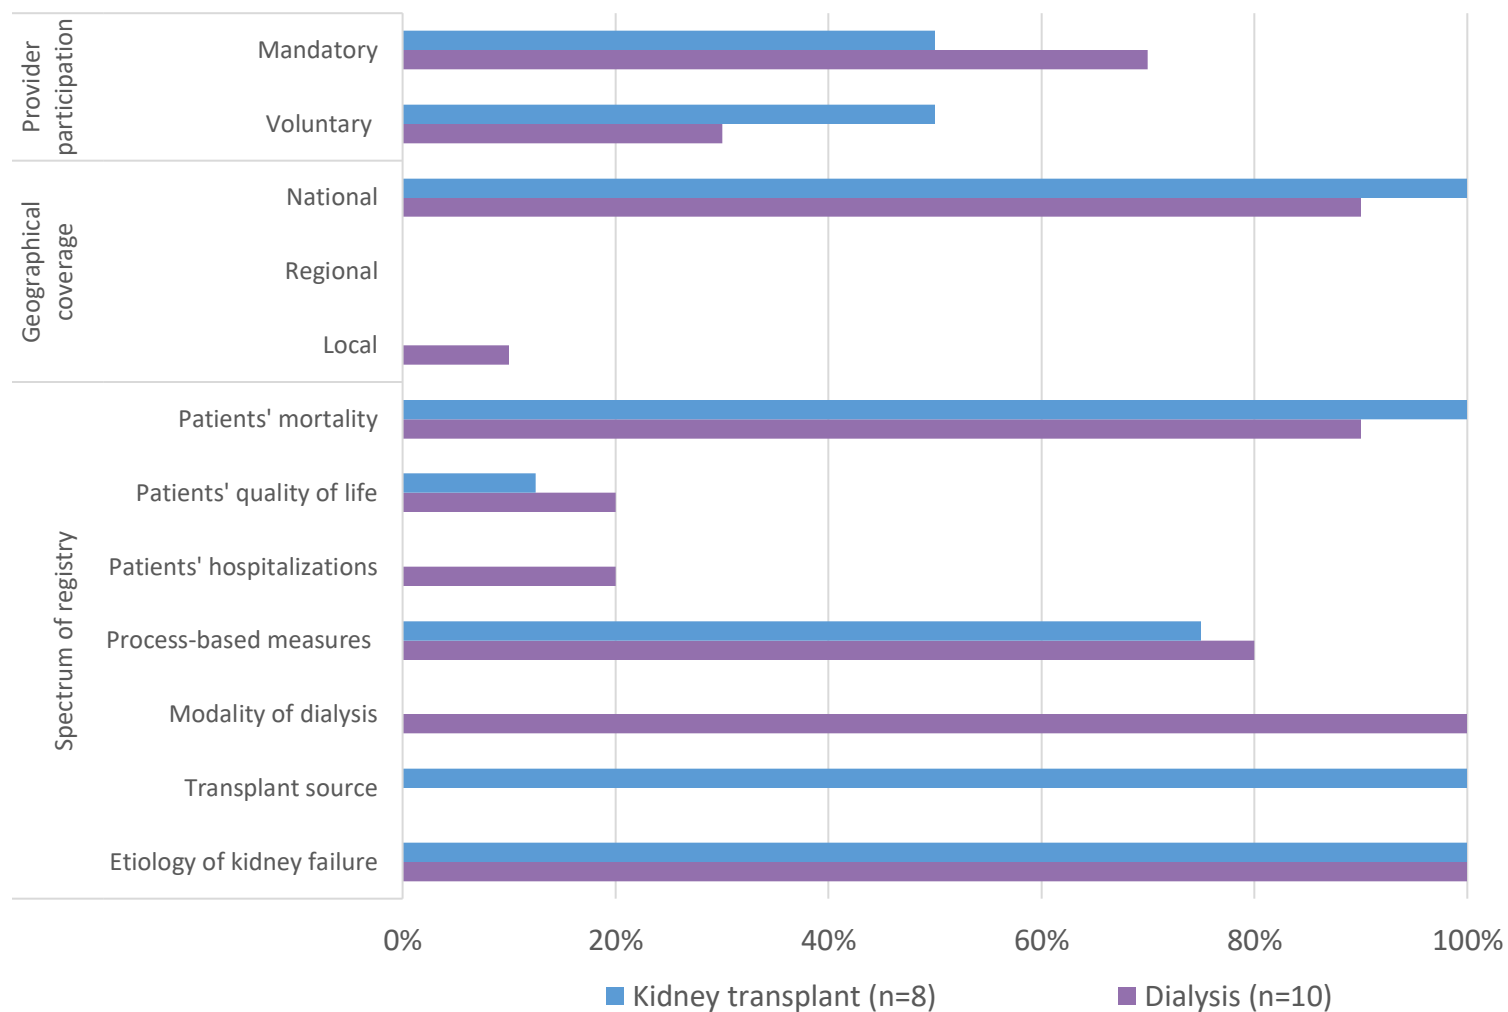

Abbreviations: ISN: International Society of Nephrology; GKHA: Global Kidney Health Atlas

**Figure S6.** National strategies available in countries reported by the 15 Oceania and South East Asia countries and territory participating in the ISN-GKHA survey.

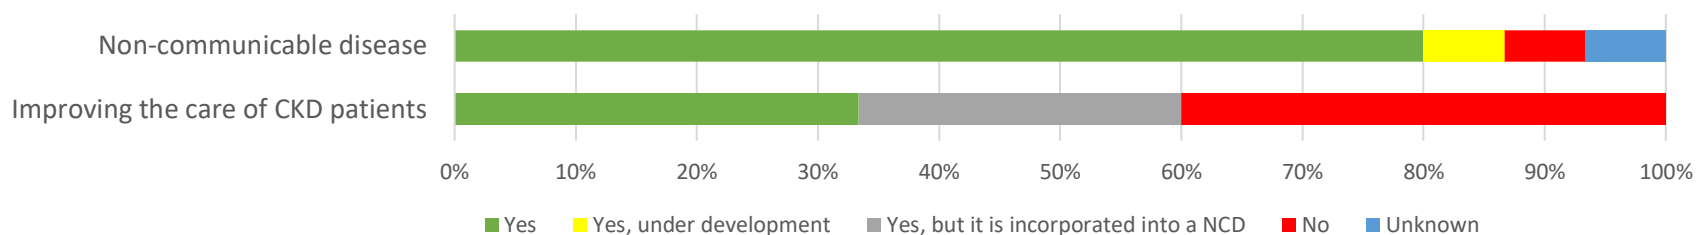

Abbreviations: ISN: International Society of Nephrology; GKHA: Global Kidney Health Atlas; CKD: chronic kidney disease; NCD: non-communicable disease

**Figure S7.** Population covered under national non-communicable disease and chronic kidney disease strategies reported by the 15 Oceania and South East Asia countries and territory participating in the ISN-GKHA survey.

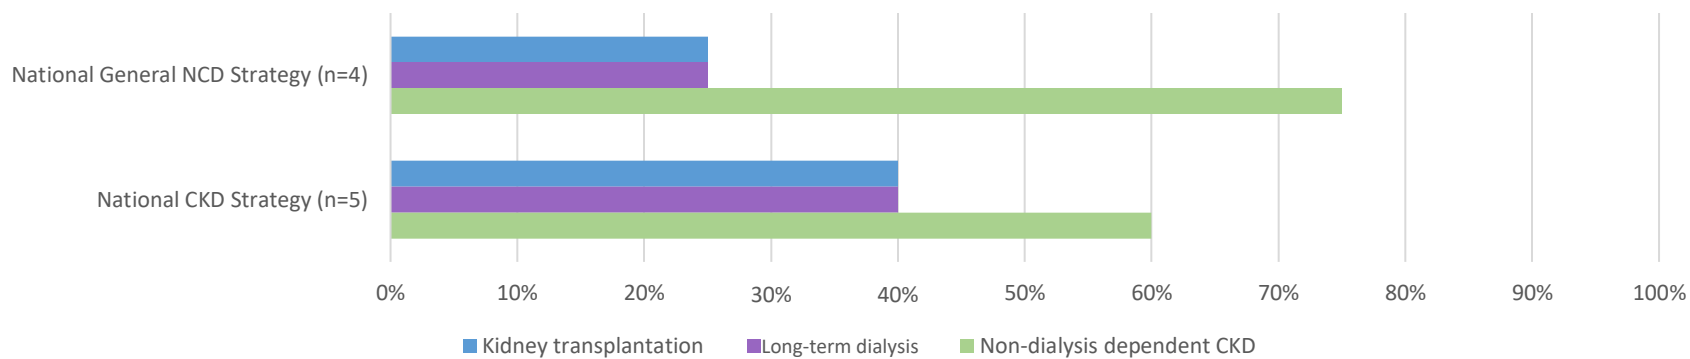

Abbreviations: ISN: International Society of Nephrology; GKHA: Global Kidney Health Atlas; CKD: chronic kidney disease; NCD: non-communicable disease

### Supplementary References:

- S1. Institute for Health Metrics and Evaluation. Global Burden of Disease Study 2017 (GBD 2017) Data Resources. Available at: <http://ghdx.healthdata.org/gbd-2017>. Accessed August 6, 2020.
- S2. World Health Organization. The Global Health Observatory. Available at: <https://www.who.int/gho/en/>. Published 2019. Accessed: August 6, 2020.
- S3. Central Intelligence Agency. The World Factbook. Available at: <https://www.cia.gov/library/publications/the-world-factbook/>. Published 2019. Accessed July 16, 2020.

**Appendix.** Reference list for annual cost of kidney replacement therapy (for Table 1) (APA format).

- Agar, J. W., Knight, R. J., Simmonds, R. E., Boddington, J. M., Waldron, C. M., & Somerville, C. A. (2005). Nocturnal haemodialysis: an Australian cost comparison with conventional satellite haemodialysis. *Nephrology*, 10(6), 557-570.
- Ashton, T., & Marshall, M. R. (2007). The organization and financing of dialysis and kidney transplantation services in New Zealand. *International journal of health care finance and economics*, 7(4), 233.
- Bavanandan, S., Yap, Y. C., Ahmad, G., Wong, H. S., Azmi, S., & Goh, A. (2015). The cost and utility of renal transplantation in Malaysia. *Transplantation direct*, 1(10).
- Hooi, L. S., Lim, T. O., Goh, A., Wong, H. S., Tan, C. C., Ahmad, G., & Morad, Z. (2005). Economic evaluation of centre haemodialysis and continuous ambulatory peritoneal dialysis in Ministry of Health hospitals, Malaysia. *Nephrology*, 10(1), 25-32.
- Howard, K., Salkeld, G., White, S., McDonald, S., Chadban, S., Craig, J. C., & Cass, A. (2009). The cost-effectiveness of increasing kidney transplantation and home-based dialysis. *Nephrology*, 14(1), 123-132.

- Khoe, L. C., Kristin, E., Masytoh, L. S., Herlinawaty, E., Werayingyong, P., Nadjib, M., ... & Teerawattananon, Y. (2017). Economic evaluation of policy options for dialysis in end-stage renal disease patients under the universal health coverage in Indonesia. *PLoS One*, 12(5), e0177436.
- Komenda, P., Gavaghan, M. B., Garfield, S. S., Poret, A. W., & Sood, M. M. (2012). An economic assessment model for in-center, conventional home, and more frequent home hemodialysis. *Kidney international*, 81(3), 307-313.
- Li, P. K., & Chow, K. M. (2001). The cost barrier to peritoneal dialysis in the developing world—an Asian perspective. *Peritoneal Dialysis International*, 21(3\_suppl), 307-313.
- Morad, Z., Lee, D. G., Lim, Y. N., & Tan, P. C. (2005). Peritoneal dialysis in Malaysia. *Peritoneal dialysis international*, 25(5), 426-431.
- Naidas, O. D., Chan-Licuanan, K. R., Velasco, V. P., Dalay, C. V., & Bayog, D. V. (1998). Cost effectiveness analysis of alternative treatments of end-stage renal disease: Philippine experience. In *Transplantation proceedings* (Vol. 30, No. 7).
- Neil, N., Walker, D. R., Sesso, R., Blackburn, J. C., Tschosik, E. A., Sciaraffia, V., ... & Bhattacharyya, S. K. (2009). Gaining efficiencies: resources and demand for dialysis around the globe. *Value in Health*, 12(1), 73-79.
- Prodjosudjadi, W. (2006). Incidence, prevalence, treatment and cost of end-stage renal disease in Indonesia. *Ethnicity and Disease*, 16(2), S2.
- Sitprija, V. (2003). Nephrology in South East Asia: fact and concept. *Kidney International*, 63, S128-S130.
- Tan, C. C., Chan, C. M., Ho, C. K., Wong, K. S., Lee, E. J., & Woo, K. T. (2005). Health economics of renal replacement therapy: perspectives from Singapore. *Kidney International*, 67, S19-S22.
- Teerawattananon, Y., Mugford, M., & Tangcharoensathien, V. (2007). Economic evaluation of palliative management versus peritoneal dialysis and hemodialysis for end-stage renal disease: evidence for coverage decisions in Thailand. *Value in health*, 10(1), 61-72.

- UKM, G. A. M. M., Singam, T. S., Morad, Z., Lim, T. O., & Pahang, J. (1999). Cost effectiveness evaluation of the Ministry of Health Malaysia dialysis programme. *Med J Malaysia*, 54, 442-452.
- Van Bui, P. (2008). How peritoneal dialysis has developed in Vietnam. *Peritoneal Dialysis International*, 28(Supplement 3), S63-S66.
- van der Tol, A., Lameire, N., Morton, R. L., Van Biesen, W., & Vanholder, R. (2019). An international analysis of dialysis services reimbursement. *Clinical Journal of the American Society of Nephrology*, 14(1), 84-93.
- Yang, F., Lau, T., & Luo, N. (2016). Cost-effectiveness of haemodialysis and peritoneal dialysis for patients with end-stage renal disease in Singapore. *Nephrology*, 21(8), 669-677.
